# Supplementary material for: Cervical spinal cord stimulation exerts anti-epileptic effects in a rat model of epileptic seizure through the suppression of CCL2-mediated cascades
Source: PubMed Central journal article supplement (PMC11196670; doi:10.1038/s41598-024-64972-y), 2024-06-24
Supplement: 41598_2024_64972_MOESM2_ESM.pdf [file 41598_2024_64972_MOESM2_ESM.pdf]

## Supplementary file 1

| <b>Score</b> | <b>Exibited behavior</b>                                                   |
|--------------|----------------------------------------------------------------------------|
| 1            | Normal behavior, absence-like immobility                                   |
| 2            | Hunching with facial automatism and/or abducted forelimbs, wet-dog shaking |
| 3            | Rearing with facial automatism and forelimb clonus                         |
| 4            | Repeated rearing with continuous forelimb clonus and falling               |
| 5            | Generalized tonic–clonic convulsions with lateral recumbence or jumping    |
